# Supplementary material for: A Lightweight Neural Network Model For Battery State Of Health
Source: Research Square preprint supplement (doi:10.21203/rs.3.rs-994980/v1), 2022-02-02
Supplement: Supplementary file 1 [file 0a2b0ad2722f6facaddc059c.docx]

**Declaration of interests**

The authors declare that they have no known competing financial interests or personal relationships that could have appeared to influence the work reported in this paper.

The authors declare the following financial interests/personal relationships which may be considered as potential competing interests:
